# Supplementary material
Source: publisher figshare collection journal article supplement (https://acs.figshare.com/ndownloader/files/34965382)
Supplement: Supplementary file 1 [file 34965382]

## Supporting Information

### Biomechanical dependence of SARS-CoV-2 infections

Alexandra Paul<sup>1,2,\*</sup>, Sachin Kumar<sup>1,3,4,\*</sup>, Tamer S. Kaoud<sup>5</sup>, Madison R. Pickett<sup>1</sup>, Amanda L. Bohanon<sup>5</sup>, Janet Zoldan<sup>1</sup>, Kevin N. Dalby<sup>5</sup>, and Sapun H. Parekh<sup>1\*</sup>

<sup>1</sup>Department of Biomedical Engineering, University of Texas at Austin, Austin, TX 78712.

<sup>2</sup>Department of Biology and Biological Engineering, Chalmers University of Technology, SE-412 98, Gothenburg, Sweden.

<sup>3</sup>Centre for Biomedical Engineering, Indian Institute of Technology Delhi, Hauz Khas, New Delhi, 110016, India.

<sup>4</sup>All India Institute of Medical Sciences, Ansari Nagar, New Delhi, 110029, India.

<sup>5</sup>Division of Chemical Biology and Medicinal Chemistry, University of Texas at Austin, Austin, TX 78712.

\*Corresponding author: alexandra.paul@utexas.edu, sachin.kumar@cbme.iitd.ac.in, sparekh@utexas.edu

## Supporting Figures

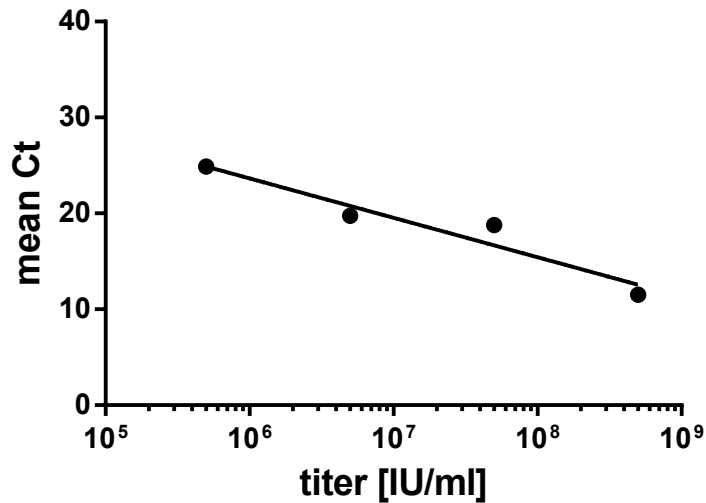

**Figure S1.** qPCR calibration of viral DNA content *versus* titer.

## Supporting Tables

**Table S1.** Viral titer in different batches of pseudotyped lentivirus production as calculated from the standard calibration curve shown in Figure S3.

| S protein mutation | mean Ct | titer [IU/ml] |
|--------------------|---------|---------------|
| WT                 | 19.772  | 8.77E+06      |
| D614G              | 22.199  | 2.25E+06      |

## Supporting Videos

**Video S1.** ZsGreen expression in ACE2 HEK 293T infected with pseudotyped lentiviruses displaying VSV-G (viral envelope glycoprotein) during the first 72 hours (image spacing: 2 h). Scale bar 300  $\mu\text{m}$ .

**Video S2.** ZsGreen expression in ACE2 HEK 293T infected with pseudotyped lentiviruses displaying WT S during the first 72 hours (image spacing: 2 h). Scale bar 300  $\mu\text{m}$ .

**Video S3.** ZsGreen expression in HEK 293T infected with pseudotyped lentiviruses displaying VSV-G (viral envelope glycoprotein) during the first 72 hours (image spacing: 2 h). Scale bar 300  $\mu\text{m}$ .

**Video S4.** ZsGreen expression in HEK 293T infected with pseudotyped lentiviruses displaying WT S during the first 72 hours (image spacing: 2 h). Scale bar 300  $\mu\text{m}$ . No infection events can be observed.
